# Supplementary material
Source: Research Square preprint supplement (doi:10.21203/rs.3.rs-8884917/v1)
Supplement: Supplementary file 1 [file 12f6ab0a926950b8dbc9d8ab.docx]

**Supplementary materials: Contrasting cognitive control in the Simon and spatial Stroop tasks regarding their interference with the control of standing balance**

Leif Johannsen1, Anton Koger1, Elisa Ruth Straub2, Denise Nadine Stephan1, Andrea Kiesel2, Iring Koch1, Hermann Müller3

1 Institute of Psychology, RWTH Aachen University, Germany

2 Department of Psychology, University of Freiburg, Germany

3 Department of Sport Science, University of Giessen, Germany

Address for correspondence

Leif Johannsen, PD Dr rer nat habil, Dipl-Psych, MSc

Cognitive and Experimental Psychology

Institute of Psychology

RWTH Aachen University, Germany

Address: Jaegerstr. 17/19, D-52066 Aachen, Germany

Tel.: +49 241 80 96 488

Email: Leif.Johannsen@psych.rwth-aachen.de

ORCID: 0000-0002-2441-3163

**Supplementary results**

As balance control was analysed separately for each cognitive task condition, we also analysed the cognitive tasks in separation.

**Manual Simon Effect**

For the Simon task, a two-way ANOVA revealed shorter RTs on congruent trials than on incongruent trials (F(1, 89)=193.28, MSE=306.01, p<.001, ƞp2=.68, BF=3.54 × 1020 ±1.14%). The main effect of previous-trial congruency was also significant (F(1, 89)=17.62, MSE=127.93, p<.001, ƞp2=.17, BF=298.65 ±3.33%) and there was an interaction between previous trial congruency and congruency (F(1, 89)=414.90, MSE=267.92, p<.001, ƞp2=.82, BF=1.60 × 1057 ±3.34%).

For the error proportions, the ANOVA revealed a main effect of congruency (F(1, 89)=59.05, MSE=8.19, p<.001, ƞp2=.40, BF=391303785 ±7.17%) showing higher error rates for incongruent trials than for congruent trials (4.8% vs. 2.5%) and thus a Simon effect of 2.3%. The main effect of previous-trial congruency (F(1, 89)=37.61, MSE=2.80, p<.001, ƞp2=.30, BF=422389.3 ±2.79%) was significant. That is, when the previous trial was congruent, error proportions were higher (4.2%) than when the previous trial was incongruent (3.1%), which expresses generally improved performance after experiencing response selection conflict. Importantly though, the interaction between congruency and previous trial congruency was significant (F(1, 89)=166.97, MSE=7.18, p<.001, ƞp2=.65, BF=3.81 × 1030 ±3.3%).

**Manual Spatial Stroop Effect**

For the Spatial Stroop task, a similar two-way ANOVA revealed shorter RTs on congruent trials than on incongruent trials (F(1, 89)=214.39, MSE=561.57, p<.001, ƞp2=.71, BF=7.65 × 1021 ±0.83%). The main effect of previous-trial congruency was also significant (F(1, 89)=57.00, MSE=79.46, p<.001, ƞp2=.39, BF=183562486 ±2.45%) and there was an interaction between previous trial congruency and congruency (F(1, 89)=866.01, MSE=169.42, p<.001, ƞp2=.91, BF=1.58 × 1062 ±3.37%).

For the error proportions, the ANOVA revealed a main effect of congruency (F(1, 89)=148.79, MSE=6.80, p<.001, ƞp2=.63, BF=5.50 × 1018 ±1.34%) showing higher error rates for incongruent trials than for congruent trials (4.7% vs. 1.3%) and thus a Spatial Stroop effect of 3.4%. The main effect of previous-trial congruency (F(1, 89)=95.57, MSE=2.65, p<.001, ƞp2=.52, BF=4.00 × 1012 ±1.2%) was significant. That is, when the previous trial was congruent, error proportions were higher (3.8%) than when the previous trial was incongruent (2.2%), which expresses generally improved performance after experiencing response selection conflict. Importantly, the interaction was significant (F(1, 89)=167.13, MSE=5.55, p<.001, ƞp2=.65, BF=1.23 × 1029 ±3.47%).

**Target‑Aligned And Response‑Aligned Time Series Analyses Of Congruency Effects In The Simon Task**

For the target-aligned variability of force moment in the Simon task in the anteroposterior direction, a modulation across the six time bins from 150 ms before to 300 ms after target onset was observed (F(2.81, 249.75)= 34.62, MSE=0.0074, p<.001, ƞp2=.28, BF=4.55 × 1026 ±0.45%; Fig. S1a), which amounted to a gradual reduction in moment variability beginning in the time bins from 75 ms after target onset. In the mediolateral direction, moment variability was also altered across the six time bins (F(3.16, 281.32)= 63.69, MSE=0.0066, p<.001, ƞp2=.42, BF=3.29× 1046 ±0.64%; Fig. 5c). A gradual reduction in moment variability began in the time bins from 75 ms after target onset. An interaction between congruency and time bins remained marginally significant only, which Bayes Factor analysis counted as not more likely than a model with just the main effect of time bins (F(3.33, 296.76) = 2.31, MSE=0.0054, p = .070, ƞp2 = .03, BF=0.03 ±2.64%). Following up this marginal interaction nevertheless indicated that for the mediolateral moment variability, a significant effect of congruency was observed in the two time bins from 75 ms before to 75 ms after target onset only (both F(1,89) > 5.31, both p<0.024, both ƞp2 > 0.06, both BF>1.74 ±1.01%; Fig. S1c). In both time bins, the moment variability was less in incongruent trials (M1=-2.60, SD1=0.47; M2=-2.63, SD2=0.47) compared to congruent trials (M1=-2.57, SD1=0.57; M2=-2.60, SD2=0.57).

Please note that congruency should not result in differences in the time bin 75 ms before target onset until target onset, because participants cannot know whether the target will be congruent or incongruent in this time bin. Thus, for evaluating if the congruency effect observed in the time bin from 75 ms before target onset until target onset was caused by potential inaccuracies in the timing of the event triggers signalling target onset, we conducted additional ANOVAs for a set of time bins that were shifted by 25 ms to the left resulting in five time bin ranging from 100 ms before to 275 ms after target onset. In this analysis, the time bin 100 ms to 25 ms before target onset did not differ depending on congruency. Only the time bin that overlapped with the target onset (from 25 ms before to 50 ms after) showed reduced force moment variability in incongruent trials (M=-2.62, SD=0.50) compared to congruent trials (M=-2.59, SD=0.52; F(1, 89)=6.21, MSE=0.0076, p=.015, ƞp2=.07, BF=2.63 ±1.16%; Tables S1, S2 and Figure S2b). The preceding time bin did show a marginal effect of congruency still (F(1, 89) = 3.91, MSE=0.0059, p = .051, ƞp2 = .04) but this effect was discounted by Bayes Factor analysis (BF=0.94 ±1.2%). It is a remarkable observation that force moment variability in the bin from 75 ms before to target-onset was reduced in incongruent trials in the target-aligned time series data too. As all trials analyzed here were post-congruent, it may also be the case that this phenomenon as an indication of pre-trial anticipation of a required switch to an incoming incongruent target.

Shifting the bin ranges by 25 ms to the left (supplementary Table S1 and Figure S1) abolished this effect and left an effect of congruency around the time of the onset of a target. Currently, we are unsure how to interpret this early effect of congruency on balance control. The effect may be an expression of preparatory engagement that ceases when the target is finally (the total ITI could last up to 2.7 s in duration) revealed as congruent. As this phenomenon did not occur in the Spatial Stroop task, it is possible that it represents a false positive finding.

For the response-aligned variability of force moment in the Simon task in the anteroposterior direction, a modulation of moment variability across the six temporal bins from 300 ms before to 150 ms after response onset was observed (F(2.64, 234.87)=8.05, MSE=0.0096, p<.001, ƞp2=.08, BF=33472.42 ±0.38%; Fig. S1b). Moment variability was smallest in the two time bins before response onset with a gradual increase from the response onwards. In the mediolateral direction, moment variability was also altered across the six time bins (F(2.40, 213.82)=8.73, MSE=0.011, p<.001, ƞp2=.09, BF=138828.40 ±0.46%; Fig. S1d). Moment variability again was smallest in the two time bins before response onset with a gradual increase from the response onwards.

In the anteroposterior direction, for the response-aligned time bins, no significant differences in any time bins that showed an effect of congruency were found. In contrast in the mediolateral direction, the Simon task demonstrated temporal bins with significant effects of congruency before response onset (F(1, 89) = 5.08, MSE= 0.0295, p = .027, ƞp2 = .05 *, BF=1.57 ±1.16%). The three time bins from 225 ms before to response onset demonstrated significant effects of congruency (all F(1,89) > 5.00, all MSE< 0.0065, all p<0.028, all ƞp2 > 0.05, all BF> 1.56 ±1.81%; Fig. S1d). The single bin with the greatest effect size was the time bin from 150 ms to 75 ms before response onset. Moment variability was lower in incongruent (M2=-2.70, SD2=0.48; M3=-2.73, SD23=0.48; M4=-2.73, SD4=0.45) compared to congruent trials (M2=-2.67, SD2=0.50; M3=-2.69, SD3=0.50; M4=-2.70, SD4=0.48).

--- Tables S1 and S2 and Figures S1 and S2 about here ---

**Target‑Aligned And Response‑Aligned Time Series Analyses Of Local Congruency Effects In The Spatial Stroop Task**

For the target-aligned variability of force moment in the Spatial Stroop task in the anteroposterior direction, a modulation across the six temporal bins from 150 ms before to 300 ms after target onset was observed (F(3.65, 324.90)=48.05, MSE=0.0040, p<.001, ƞp2=.35, BF=2.11 × 1036 ±0.44%; Fig. S3a). A gradual reduction in moment variability began in the time bins from 75 ms after target onset. In the mediolateral direction, moment variability was also altered across the six time points (F(3.52, 312.88)= 60.15, MSE=0.0050, p<.001, ƞp2=.40, BF=1.98 × 1044 ±0.55%; Fig. S3c). Moment variability showed its minimum in the two time bins before response onset with a gradual increase from the response onwards. In the Spatial Stroop task, target-alignment did not result in any time bins with significant congruency effects in either direction.

For the response-aligned variability of force moment in the Spatial Stroop task in the anteroposterior direction, a modulation across the six temporal bins from 300 ms before to 150 ms after response onset was observed (F(2.71, 240.94)=9.46, MSE=0.0087, p<.001, ƞp2=.10, BF=632295 ±0.49%; Fig. S3c). A gradual reduction in moment variability until the time bin from 75 ms before to response onset occurred. In the mediolateral direction, moment variability was also altered across the six time points (F(2.46, 219.32)=11.47, MSE=0.010, p<.001, ƞp2=.11, BF=39936810 ±0.54%; Fig. S3d). Moment variability was smallest in the two time bins before response onset with a gradual increase from the response onwards.

Similar to the Simon task, no significant differences depending on congruency were found in time bins in the anteroposterior direction in the Spatial Stroop task. In the mediolateral direction, a main effect of congruency was significant (F(1, 89) = 7.63, MSE= 0.0244, p = .007, ƞp2 = .08, BF=4.92 ±2.26%) and four time bins that ranged from 300 ms before to response onset differed depending on congruency. The largest effect size was observed in the time bin from 75 ms to response onset (all F(1,89) > 4.72, all MSE< 0.0090, all p<0.032, all ƞp2 > 0.05, all BF>1.35 ±1.46%; Fig. S3d). Again, moment variability was lower in incongruent trials (M1=-2.67, SD1=0.53; M2=-2.69, SD2=0.53; M3=-2.72, SD3=0.52; M4=-2.72, SD4=0.51) compared to congruent trials (M1=-2.64, SD1=0.53; M2=-2.66, SD2=0.55; M3=-2.68, SD3=0.53; M4=-2.68, SD4=0.53).

--- Figure S3 about here ---

Tables

| Cognitive conflict task | Time bin | -100 to -25 ms | | -25 to 50 ms | | 50 to 125 ms | | 125 to 200 ms | | 200 to 275 ms | |
| --- | --- | --- | --- | --- | --- | --- | --- | --- | --- | --- | --- |
| M | SD | M | SD | M | SD | M | SD | M | SD |
| Congruency |  |  |  |  |  |  |  |  |  |  |
| Simon task | Incongruent | -2.60 | 0.50 | -2.62 | 0.50 | -2.63 | 0.49 | -2.65 | 0.51 | -2.68 | 0.49 |
| Congruent | -2.58 | 0.53 | -2.59 | 0.52 | -2.62 | 0.53 | -2.64 | 0.51 | -2.67 | 0.50 |
| Congruency effect | -0.023 | 0.11 | -0.032 | 0.12 | -0.012 | 0.13 | -0.011 | 0.13 | -0.005 | 0.11 |
| Spatial Stroop  task | Incongruent | -2.59 | 0.56 | -2.60 | 0.56 | -2.61 | 0.55 | -2.63 | 0.55 | -2.66 | 0.55 |
| Congruent | -2.58 | 0.56 | -2.59 | 0.55 | -2.61 | 0.55 | -2.63 | 0.55 | -2.66 | 0.53 |
| Congruency effect | -0.008 | 0.12 | -0.009 | 0.11 | 0.003 | 0.11 | 0.002 | 0.09 | -0.004 | 0.10 |

Table S1. Descriptive statistics of the target-aligned mediolateral force moment variability for both cognitive tasks as a function of congruency and time bin (shifted by -25 ms). M: mean, S: standard deviation.

|  | |  | F, p, partial eta^2 | | | | |
| --- | --- | --- | --- | --- | --- | --- | --- |
| Temporal bin | -100 to -25 ms | -25 to 50 ms | 50 to 125 ms | 125 to 200 ms | 200 to 275 ms |
| Target-aligned | Simon task | Anteroposterior | F(1, 89)= 0.15, p=.70, **ƞp2**<.01 | F(1, 89)= 0.05, p=.82, **ƞp2**<.01 | F(1, 89)= 0.87, p=.35, **ƞp2**<.01 | F(1, 89)= 0.25, p=.62, **ƞp2**<.01 | F(1, 89)= 0.12, p=.73, **ƞp2**<.01 |
| Mediolateral | F(1, 89)= 3.91, p=.05, **ƞp2**=.04 | **F(1, 89)= 6.21, p=.02, ƞp2=.07** | F(1, 89)= 0.79, p=.38, **ƞp2**<.01 | F(1, 89)= 0.64, p=.43, **ƞp2**<.01 | F(1, 89)= 0.16, p=.69, **ƞp2**<.01 |
| Spatial Stroop task | Anteroposterior | F(1, 89)= 1.49, p=.23, **ƞp2**=.02 | F(1, 89)= 0.04, p=.84, **ƞp2**<.01 | F(1, 89)= 1.25, p=.27, **ƞp2**=.01 | F(1, 89)= 0.72, p=.40, **ƞp2**<.01 | F(1, 89)= 0.37, p=.55, **ƞp2**<.01 |
| Mediolateral | F(1, 89)= 0.51, p=.48, **ƞp2**<.01 | F(1, 89)= 0.62, p=.43, **ƞp2**<.01 | F(1, 89)= 0.06, p=.81, **ƞp2**<.01 | F(1, 89)= 0.05, p=.82, **ƞp2**<.01 | F(1, 89)= 0.19, p=.67, **ƞp2**<.01 |

Table S2. Test statistics of ANOVAs of the congruency effect for the moment variability in each temporal bin (target-aligned) for both task conditions and both directions of body sway. Significant effects or interactions are indicated in bold.

Figures

Figure S1. Raincloud plots of the distributions of the anteroposterior (A) and mediolateral (B) log-transformed standard-deviation of moment variability in the Simon task across the target-aligned temporal bins as a function of congruency (only for trials where the previous trial was congruent too) for each extracted time bin (75 ms width; from 150 ms before to 300 ms after target onset). Raincloud plots of the distributions of the log-transformed standard-deviation of moment variability across the response-aligned temporal bins in the anteroposterior (C) and mediolateral (D: from 300 ms before to 150 ms after response onset). Significant effects are indicated with asterisks (*: p<0.05, **: p<0.01).

Figure S2. Raincloud plots of the distributions of the anteroposterior (A) and mediolateral (B) log-transformed standard-deviation of moment variability in the Simon task across the target-aligned temporal bins as a function of congruency (only for trials where the previous trial was congruent too) for each extracted time bin (75 ms width; from 100 ms before to 275 ms after target onset). Raincloud plots of the distributions of the log-transformed standard-deviation of moment variability across the target-aligned temporal bins in the anteroposterior (C) and mediolateral (D) direction in the Spatial Stroop task (from 100 ms before to 275 ms after target onset). Significant effects are indicated with asterisks (*: p<0.05).

Figure S3. Raincloud plots of the distributions of the anteroposterior (A) and mediolateral (B) log-transformed standard-deviation of moment variability in the Spatial Stroop task across the target-aligned temporal bins as a function of congruency (only for trials where the previous trial was congruent too) for each extracted time bin (75 ms width; from 150 ms before to 300 ms after target onset). Raincloud plots of the distributions of the log-transformed standard-deviation of moment variability across the response-aligned temporal bins in the anteroposterior (C) and mediolateral (D: from 300 ms before to 150 ms after response onset). Significant effects are indicated with asterisks (*: p<0.05, **: p<0.01; ***: p<0.001).
